# Supplementary material for: Investigating USP42 Mutation as Underlying Cause of Familial Non-Medullary Thyroid Carcinoma
Source: MDPI journal article supplement (doi:10.3390/ijms25031522), 2024-01-26
Supplement: s1 [file s1]

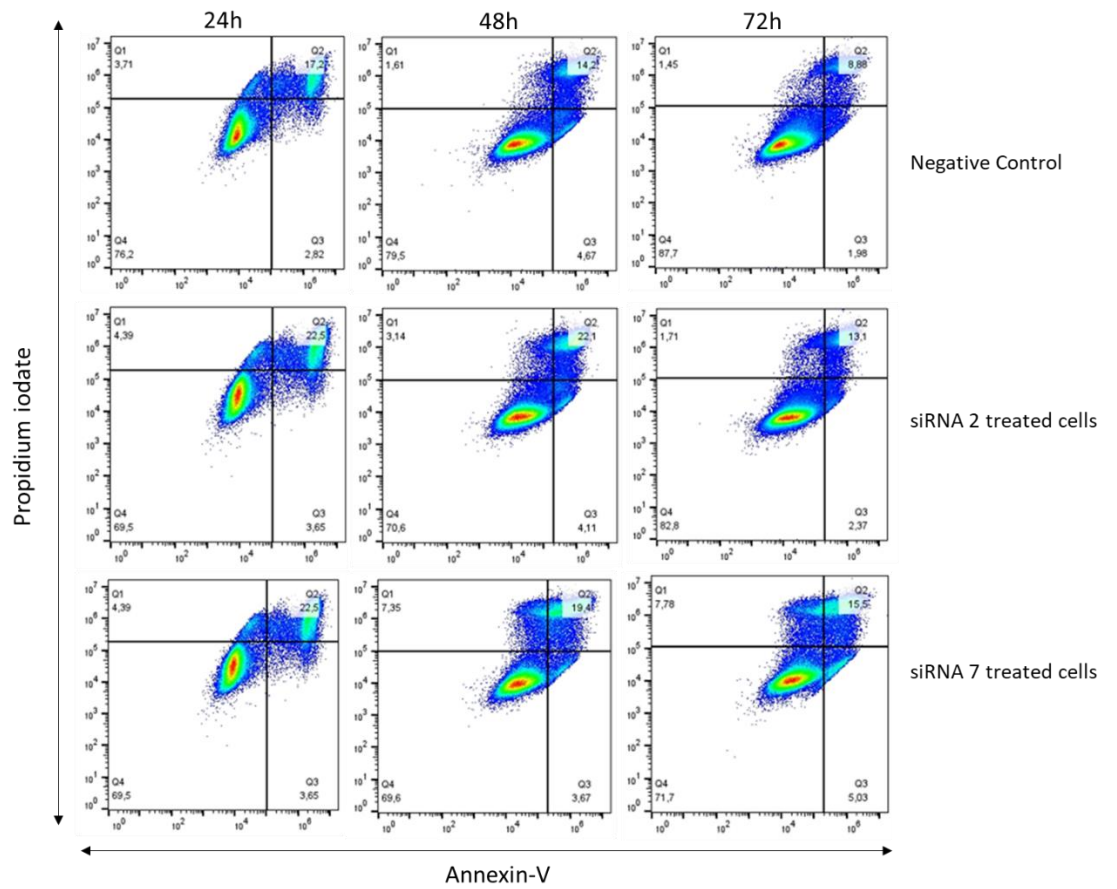

**Figure S2** – Apoptosis assays: representative analysis of Annexin-V and Propidium iodide staining. Cell viability and cell mortality analysis at the studied timepoints. Q1 – Necrotic cells (AnnexinV<sup>+</sup>/PI<sup>+</sup>), Q2 - Late apoptotic (AnnexinV<sup>+</sup>/PI<sup>+</sup>), Q3 - Early apoptotic cells (AnnexinV<sup>+</sup>/PI<sup>-</sup>), Q4 – Viable cells (AnnexinV<sup>-</sup>/PI<sup>-</sup>). Each experiment was performed with duplicates and three independent experiments were conducted.
