# Supplementary material for: Investigating USP42 Mutation as Underlying Cause of Familial Non-Medullary Thyroid Carcinoma
Source: MDPI journal article supplement (doi:10.3390/ijms25031522), 2024-01-26
Supplement: s1 [file s1]

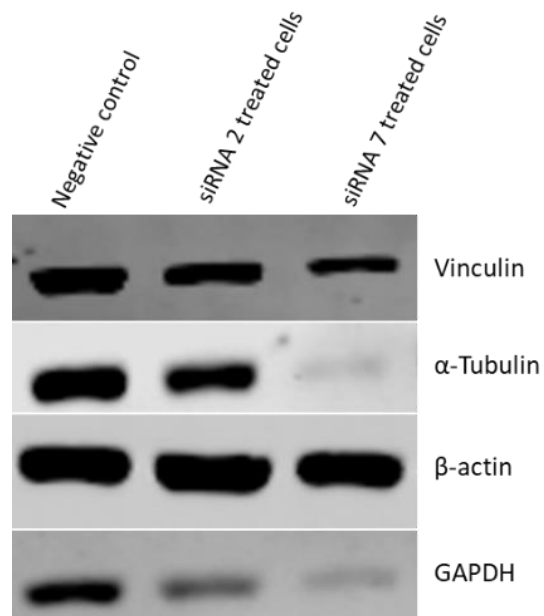

**Figure S3** – Representative blots of housekeeping genes that were silenced by siRNA 2 and 7 treatments. This effect was more evident in siRNA 7 treated cells.

---
