# Supplementary material for: Investigating USP42 Mutation as Underlying Cause of Familial Non-Medullary Thyroid Carcinoma
Source: MDPI journal article supplement (doi:10.3390/ijms25031522), 2024-01-26
Supplement: s1 [file s1]

**Table S1.** Somatic pathogenic genetic alterations affecting the UPS gene family in papillary thyroid carcinomas taken from TCGA.

| Tumor Sample    | Histology                | Gene            | <sup>1</sup> Chr. | Position/Cytoband | Mutation type     | Alternate Allele | Aminoacid change         | PolyPhen          | SIFT        |
|-----------------|--------------------------|-----------------|-------------------|-------------------|-------------------|------------------|--------------------------|-------------------|-------------|
| TCGA-BJ-A3EZ-01 | PTC NOS                  | <i>USP9Y</i>    | Y                 | 14924964          | Missense          | A > C            | <i>p.Tyr1529Ser</i>      | possibly_damaging | deleterious |
| TCGA-CE-A481-01 | PTC NOS                  | <i>USP6</i>     | 17                | 5076261           | Frameshift_Del    | TA > -           | <i>p.Met1404Valfs*23</i> | .                 | .           |
| TCGA-DJ-A13O-01 | FVPTC                    | <i>USP40</i>    | 2                 | 234468516         | Missense          | C > A            | <i>p.Asp108Tyr</i>       | probably_damaging | deleterious |
| TCGA-DJ-A1QE-01 | PTC NOS                  | <i>USP51</i>    | X                 | 55514742          | Missense          | G > C            | <i>p.Leu211Val</i>       | possibly_damaging | deleterious |
| TCGA-DJ-A1QL-01 | FVPTC                    | <i>USP28</i>    | 11                | 113705033         | Nonsense          | G > A            | <i>p.Arg187*</i>         | .                 | .           |
| TCGA-DJ-A2Q9-01 | PTC with oncocytic cells | <i>USP46</i>    | 4                 | 53492228          | Missense          | T > C            | <i>p.Gln173Arg</i>       | benign            | deleterious |
| TCGA-E8-A2EA-01 | PTC NOS                  | <i>USP43</i>    | 17                | 9596525           | Missense          | C > A            | <i>p.Leu479Ile</i>       | probably_damaging | deleterious |
| TCGA-EL-A3GP-01 | PTC NOS                  | <i>USP6</i>     | 17                | 5076150           | Nonsense          | T > A            | <i>p.Lyr1366*</i>        | .                 | .           |
| TCGA-EL-A3H5-01 | PTC NOS                  | <i>USP9X</i>    | X                 | 41075213          | Missense          | A > C            | <i>p.Lys1798Thr</i>      | probably_damaging | deleterious |
| TCGA-EL-A3MY-01 | PTC with oncocytic cells | <i>USP9X</i>    | X                 | 41043681          | Frameshift_Ins    | - > A            | <i>p.Pro1105Thrfs*4</i>  | .                 | .           |
| TCGA-EL-A3ZO-01 | PTC NOS                  | <i>USP26</i>    | X                 | 132161783         | Nonsense_Mutation | G > A            | <i>p.Gln156*</i>         | .                 | .           |
| TCGA-EL-A4K7-01 | PTC NOS                  | <i>USP49</i>    | 6                 | 41767589          | Missense          | C > A            | <i>p.Arg550Leu</i>       | probably_damaging | deleterious |
| TCGA-EM-A22P-01 | PTC NOS                  | <i>USP48</i>    | 1                 | 22033083          | Splice Site       | C > G            | <i>p.X697_splice</i>     | .                 | .           |
| TCGA-EM-A4FM-01 | PTC NOS                  | <i>USP9X</i>    | X                 | 41058005          | Splice Site       | T > C            | <i>p.X1535_splice</i>    | .                 | .           |
| TCGA-ET-A39P-01 | PTC with oncocytic cells | <i>USP42</i>    | 7                 | 6189833           | Missense          | C > A            | <i>p.Pro669Gln</i>       | benign            | deleterious |
| TCGA-FE-A2Z2-01 | PTC with oncocytic cells | <i>USP9X</i>    | X                 | 40988337          | Nonsense          | G > T            | <i>p.Glu61*</i>          | .                 | .           |
| TCGA-BJ-A0Z0-01 | FVPTC                    | <i>USP17L10</i> | 4                 | p16.1             | Amplification     | .                | .                        | .                 | .           |
| TCGA-BJ-A0Z0-01 | FVPTC                    | <i>USP17L11</i> | 4                 | p16.1             | Amplification     | .                | .                        | .                 | .           |
| TCGA-BJ-A0Z0-01 | FVPTC                    | <i>USP17L12</i> | 4                 | p16.1             | Amplification     | .                | .                        | .                 | .           |
| TCGA-BJ-A0Z0-01 | FVPTC                    | <i>USP17L13</i> | 4                 | p16.1             | Amplification     | .                | .                        | .                 | .           |
| TCGA-BJ-A0Z0-01 | FVPTC                    | <i>USP17L15</i> | 4                 | p16.1             | Amplification     | .                | .                        | .                 | .           |
| TCGA-BJ-A0Z0-01 | FVPTC                    | <i>USP17L17</i> | 4                 | p16.1             | Amplification     | .                | .                        | .                 | .           |
| TCGA-BJ-A0Z0-01 | FVPTC                    | <i>USP17L18</i> | 4                 | p16.1             | Amplification     | .                | .                        | .                 | .           |
| TCGA-BJ-A0Z0-01 | FVPTC                    | <i>USP17L19</i> | 4                 | p16.1             | Amplification     | .                | .                        | .                 | .           |
| TCGA-BJ-A0Z0-01 | FVPTC                    | <i>USP17L20</i> | 4                 | p16.1             | Amplification     | .                | .                        | .                 | .           |
| TCGA-BJ-A0Z0-01 | FVPTC                    | <i>USP17L24</i> | 4                 | p16.1             | Amplification     | .                | .                        | .                 | .           |
| TCGA-BJ-A0Z0-01 | FVPTC                    | <i>USP17L25</i> | 4                 | p16.1             | Amplification     | .                | .                        | .                 | .           |
| TCGA-BJ-A0Z0-01 | FVPTC                    | <i>USP17L26</i> | 4                 | p16.1             | Amplification     | .                | .                        | .                 | .           |
| TCGA-BJ-A0Z0-01 | FVPTC                    | <i>USP17L27</i> | 4                 | p16.1             | Amplification     | .                | .                        | .                 | .           |
| TCGA-BJ-A0Z0-01 | FVPTC                    | <i>USP17L28</i> | 4                 | p16.1             | Amplification     | .                | .                        | .                 | .           |
| TCGA-BJ-A0Z0-01 | FVPTC                    | <i>USP17L29</i> | 4                 | p16.1             | Amplification     | .                | .                        | .                 | .           |
| TCGA-BJ-A0Z0-01 | FVPTC                    | <i>USP17L30</i> | 4                 | p16.1             | Amplification     | .                | .                        | .                 | .           |
| TCGA-BJ-A0Z0-01 | FVPTC                    | <i>USP17L6P</i> | 4                 | p16.1             | Amplification     | .                | .                        | .                 | .           |
| TCGA-BJ-A0Z0-01 | FVPTC                    | <i>USP17L9P</i> | 4                 | p16.1             | Amplification     | .                | .                        | .                 | .           |

\*1 Chr. – Chromosome; PTC, papillary thyroid carcinoma; NOS, Not otherwise specified; FVPTC, follicular variant of papillary thyroid carcinoma.
